# Supplementary material for: NRP1 promotes prostate cancer progression via modulating EGFR-dependent AKT pathway activation
Source: Springer Nature journal article supplement (doi:10.1038/s41419-023-05696-1), 2023-02-25

**Figure 2**

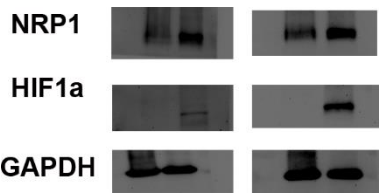

**Figure 3**

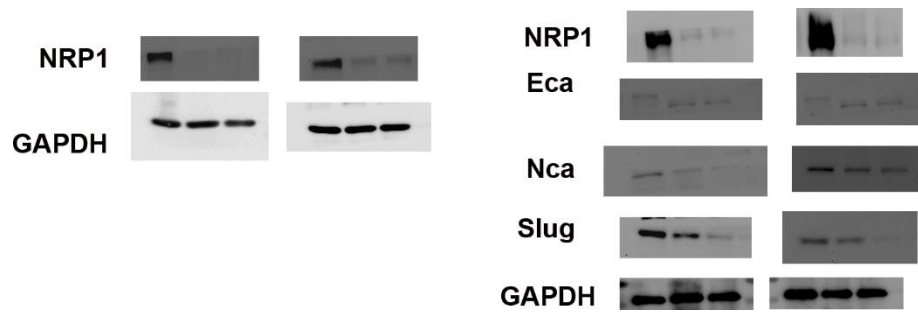

**Figure 4**

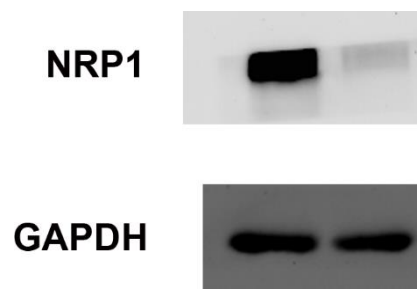

**Figure 5**

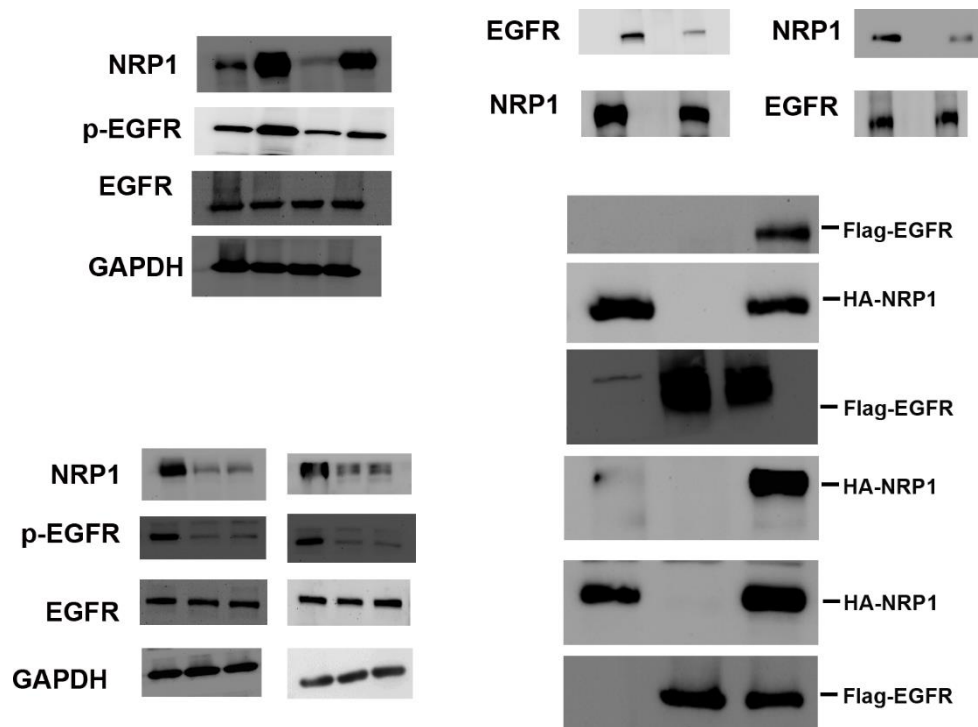

**Figure 6**

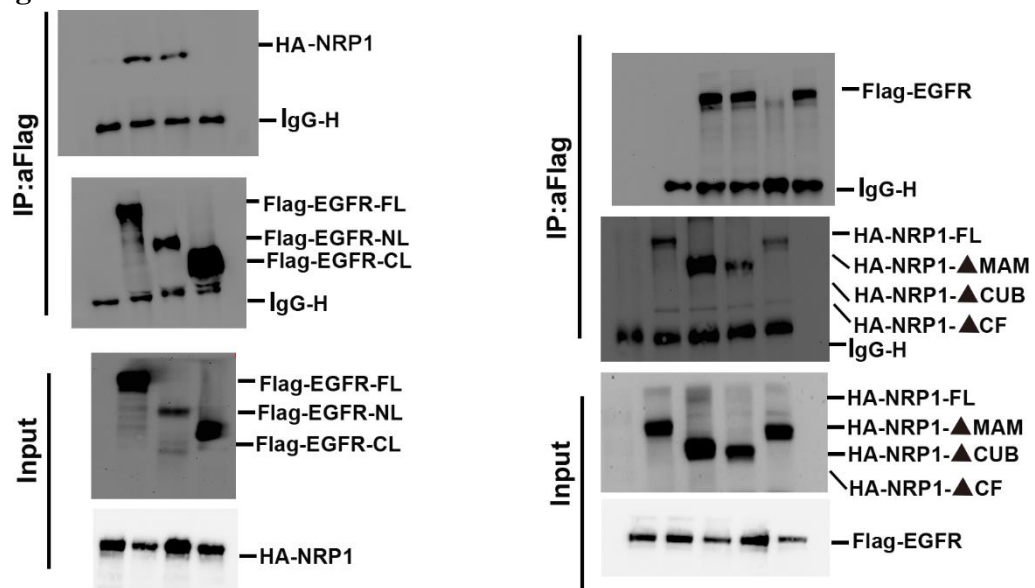

Figure 7

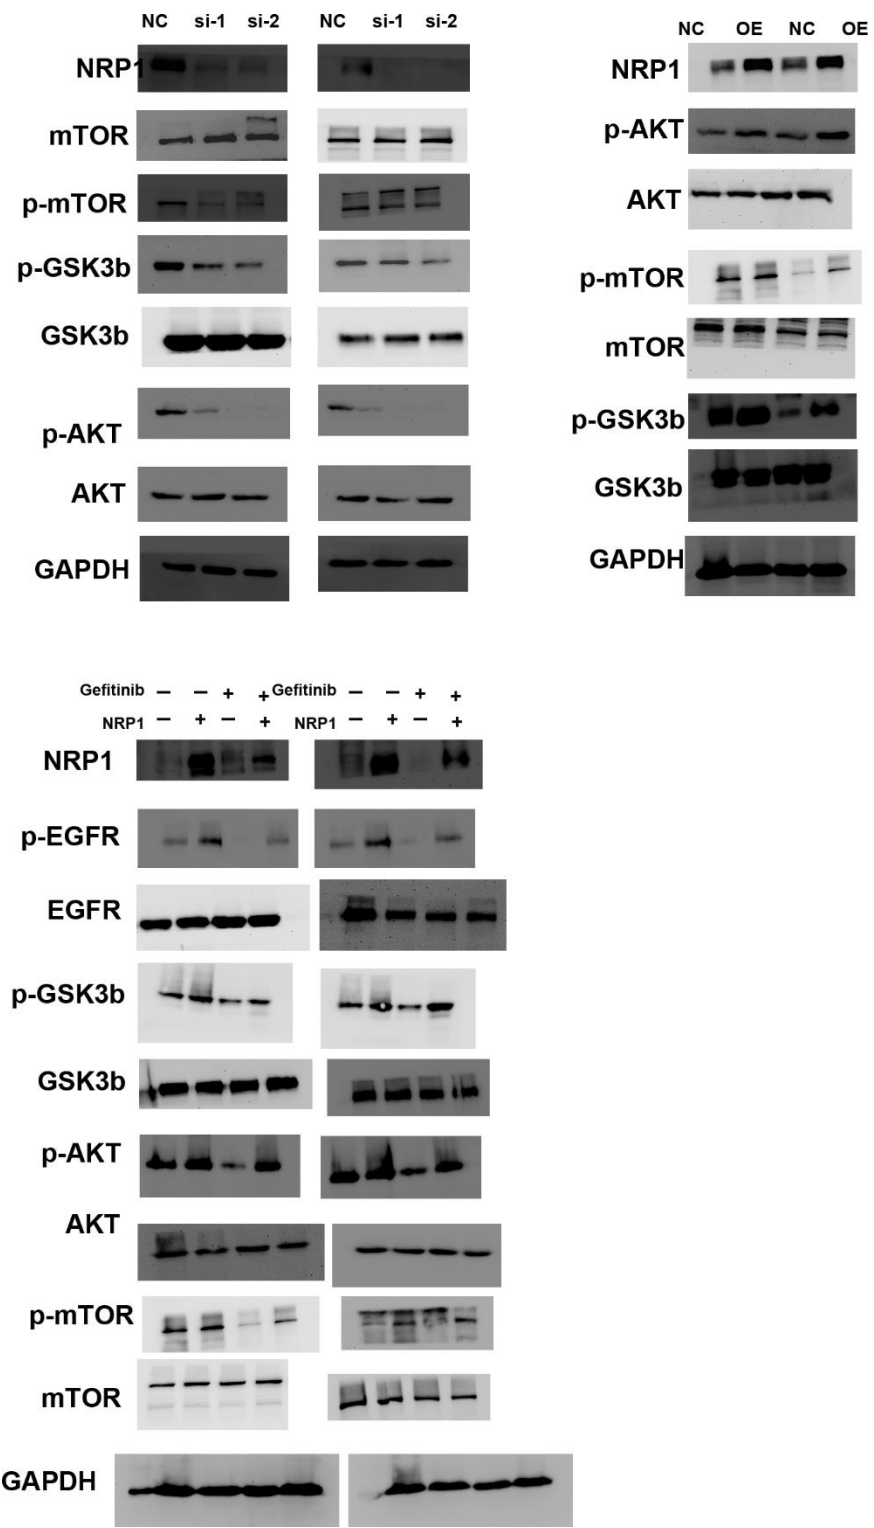

**Figure 8**

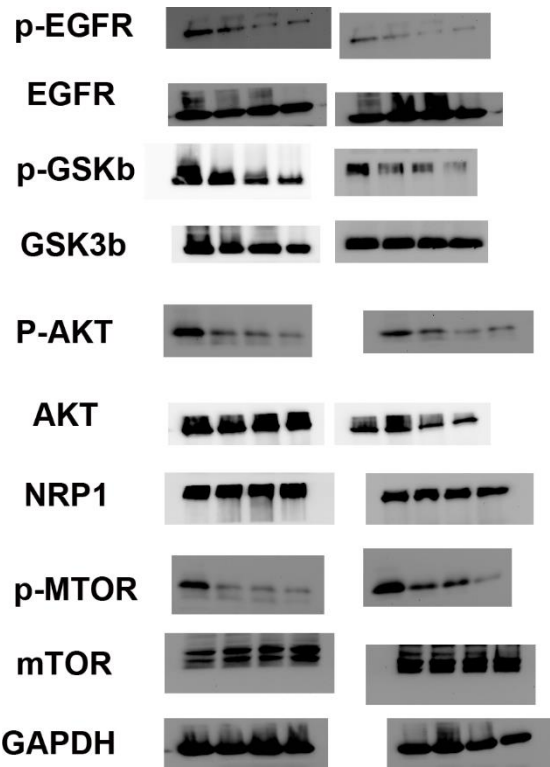

**Figure S1**

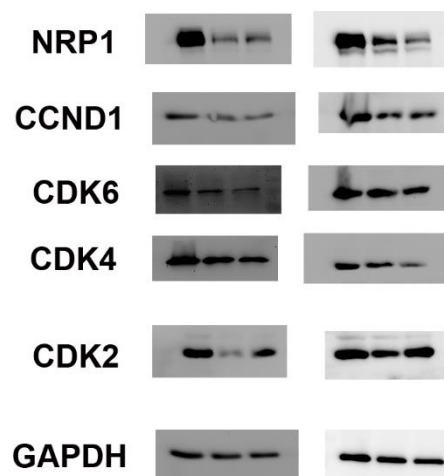



**Figure S2**

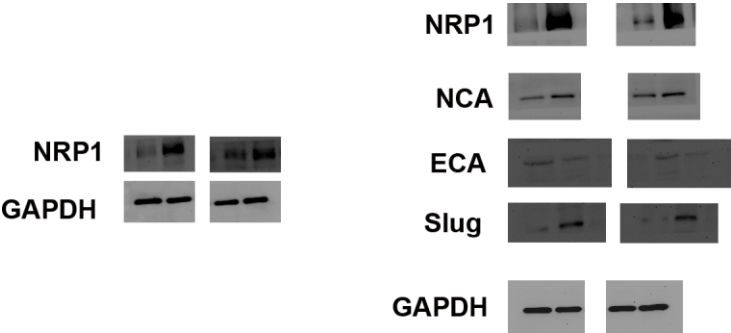

**Figure S3**

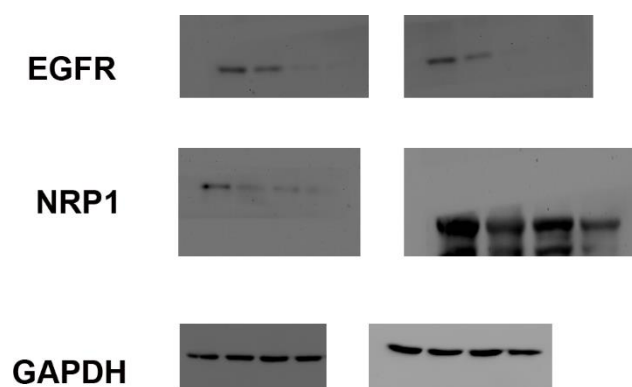

Supplement: MOESM1 [file 41419_2023_5696_MOESM1_ESM.pdf]
